# Supplementary material
Source: MDPI journal article supplement (https://www.mdpi.com/2072-4292/15/7/1944)
Supplement: s1 [file s1 › remotesensing-2229652-supplementary.pdf]

## Supplementary data

|            |         |      |         |       |
|------------|---------|------|---------|-------|
| Sentinel-2 | Landsat |      |         |       |
|            |         | Snow | No snow | Total |
|            | Snow    | 7360 | 540     | 7900  |
|            | No snow | 15   | 88001   | 88016 |
|            | Total   | 7375 | 88541   | 95916 |

**Supplementary Table S1** Confusion matrix showing accuracy of Landsat-8 June 1st 2016 satellite image in classifying snow-covered pixels, using June 2<sup>nd</sup> 2016 Sentinel-2 image for validation. All numbers are pixel counts. User's accuracy is 99.8% and producer's accuracy is 93.2%.

| Sentinel-2 | Landsat |      |         |       |
|------------|---------|------|---------|-------|
|            |         | Snow | No snow | Total |
|            | Snow    | 3307 | 318     | 3625  |
|            | No snow | 1    | 41086   | 41087 |
|            | Total   | 3308 | 41404   | 44712 |

**Supplementary Table S2** Confusion matrix showing accuracy of Landsat-8 June 3rd 2016 satellite image in classifying snow-covered pixels, using June 2<sup>nd</sup> 2016 Sentinel-2 image for validation. All numbers are pixel counts. User's accuracy is 100% and producer's accuracy is 91.2%.

| Sentinel-2 | Landsat |       |         |
|------------|---------|-------|---------|
|            |         | Snow  | No snow |
|            | Snow    | 187   | 107     |
|            | No snow | 4     | 113550  |
|            | Total   | 191   | 113657  |
|            |         | Total | 113848  |

**Supplementary Table S3** Confusion matrix showing accuracy of Landsat-8 June 26<sup>th</sup> 2019 satellite image in classifying snow-covered pixels, using June 27<sup>th</sup> 2019 Sentinel-2 image for validation. All numbers are pixel counts. User's accuracy is 97.9% and producer's accuracy is 63.6%.

| Sentinel-2 | Landsat |       |         |
|------------|---------|-------|---------|
|            |         | Snow  | No snow |
|            | Snow    | 437   | 146     |
|            | No snow | 1     | 394287  |
|            | Total   | 438   | 394433  |
|            |         | Total | 394871  |

**Supplementary Table S4** Confusion matrix showing accuracy of Landsat-8 June 28<sup>th</sup> 2019 satellite image in classifying snow-covered pixels, using June 27<sup>th</sup> 2019 Sentinel-2 image for validation. All numbers are pixel counts. User's accuracy is 99.8% and producer's accuracy is 75.0%.

|            |         |      |         |
|------------|---------|------|---------|
| Sentinel-2 | Landsat |      |         |
|            |         | Snow | No snow |
|            | Snow    | 215  | 60      |
|            | No snow | 1    | 49453   |
|            | Total   | 216  | 49513   |

**Supplementary Table S5** Confusion matrix showing accuracy of Landsat-8 July 1st 2021 satellite image in classifying snow-covered pixels, using July 1st 2021 Sentinel-2 image for validation. All numbers are pixel counts. User's accuracy is 99.5% and producer's accuracy is 78.2%.

|            |         |      |         |
|------------|---------|------|---------|
| Sentinel-2 | Landsat |      |         |
|            |         | Snow | No snow |

|  |         |      |        |        |
|--|---------|------|--------|--------|
|  | Snow    | 3108 | 562    | 3670   |
|  | No snow | 16   | 381230 | 381246 |
|  | Total   | 3124 | 381792 | 384916 |

**Supplementary Table S6** Confusion matrix showing accuracy of Landsat-8 June 4<sup>th</sup> 2022 satellite image in classifying snow-covered pixels, using June 4<sup>th</sup> 2022 Sentinel-2 image for validation. All numbers are pixel counts. User's accuracy is 99.5% and producer's accuracy is 84.7%.

|            |         |      |         |        |
|------------|---------|------|---------|--------|
| Sentinel-2 | Landsat |      |         |        |
|            |         | Snow | No snow | Total  |
|            | Snow    | 489  | 239     | 728    |
|            | No snow | 0    | 289890  | 289890 |
|            | Total   | 489  | 290129  | 290618 |

**Supplementary Table S7** Confusion matrix showing accuracy of Landsat-7 June 24<sup>th</sup> 2018 satellite image in classifying snow-covered pixels, using June 25<sup>th</sup> 2018 Sentinel-2 image for validation. All numbers are pixel counts. User's accuracy is 100% and producer's accuracy is 67.2%.

|            |         |      |         |        |
|------------|---------|------|---------|--------|
| Sentinel-2 | Landsat |      |         |        |
|            |         | Snow | No snow | Total  |
|            | Snow    | 366  | 202     | 568    |
|            | No snow | 2    | 281194  | 281196 |
|            | Total   | 368  | 281396  | 281764 |

**Supplementary Table S8** Confusion matrix showing accuracy of Landsat-7 June 27<sup>th</sup> 2019 satellite image in classifying snow-covered pixels, using June 27<sup>th</sup> 2019 Sentinel-2 image for validation. All numbers are pixel counts. User's accuracy is 99.5% and producer's accuracy is 64.4%.

|            |         |      |         |       |
|------------|---------|------|---------|-------|
| Sentinel-2 | Landsat |      |         |       |
|            |         | Snow | No snow | Total |
|            | Snow    | 83   | 72      | 15    |
|            | No snow | 0    | 28747   | 28747 |
|            | Total   | 83   | 28819   | 28902 |

**Supplementary Table S9** Confusion matrix showing accuracy of Landsat-7 July 2nd 2021 satellite image in classifying snow-covered pixels, using July 1<sup>st</sup> 2021 Sentinel-2 image for validation. All numbers are pixel counts. User's accuracy is 100% and producer's accuracy is 87.0%.
